# Supplementary material for: MUTYH mediates the toxicity of combined DNA 6-thioguanine and UVA radiation
Source: PubMed Central journal article supplement (PMC4480694; doi:10.18632/oncotarget.3037), 2014-12-02
Supplement: oncotarget-06-7481-s001.pdf [file oncotarget-06-7481-s001.pdf]

# MUTYH mediates the toxicity of combined DNA 6-thioguanine and UVA radiation

## Supplementary Material

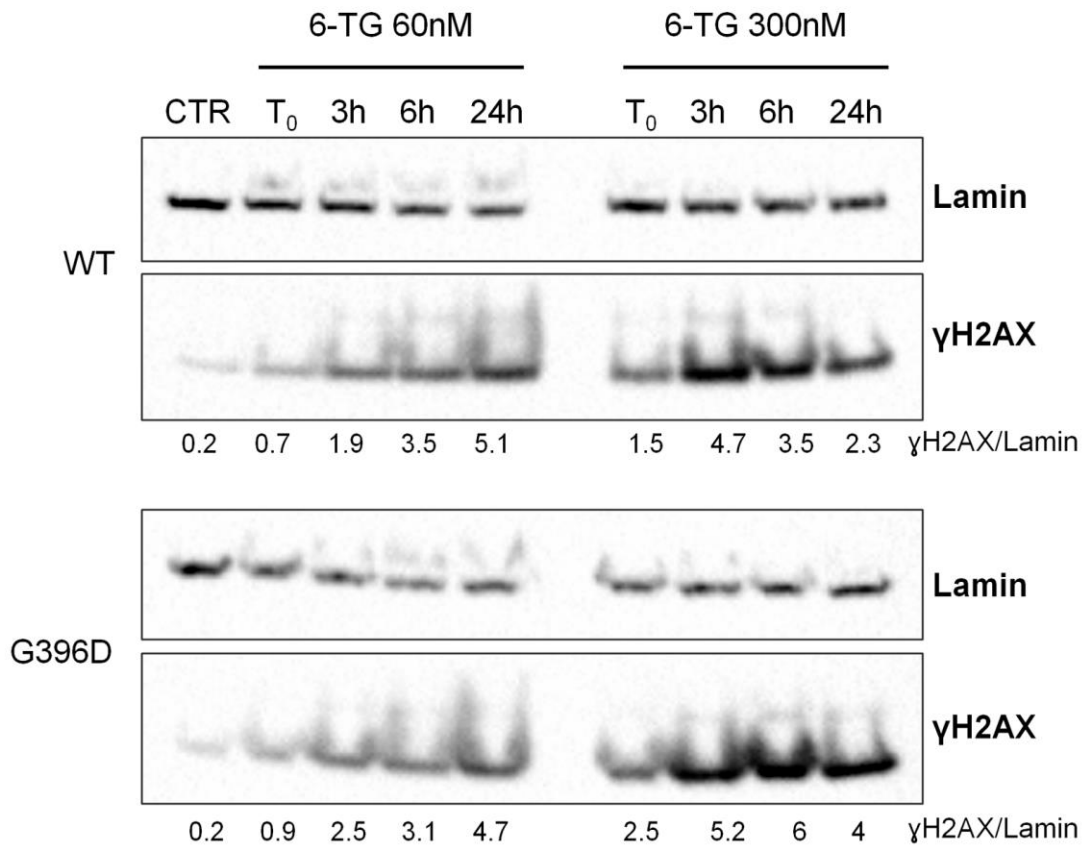

**Figure S1.** A representative western blotting of  $\gamma$ H2AX and Lamin proteins in WT and G396D-expressing MEFs at various time points after 6-TG/UVA treatment (48h growth in 60nM or 300nM 6-TG followed by UVA irradiation). Under the blot values of normalized  $\gamma$ H2AX expression as  $\gamma$ H2AX/Lamin ratio are shown.
